# Supplementary material for: Anti-osteosarcoma effect of hydroxyapatite nanoparticles both in vitro and in vivo by downregulating the FAK/PI3K/Akt signaling pathway
Source: Royal Society of Chemistry journal article supplement (doi:10.1039/d0bm00898b), 2020-01-01
Supplement: d0bm00898b1.pdf [file d0bm00898b1.pdf]

ARTICLE

Supporting Information

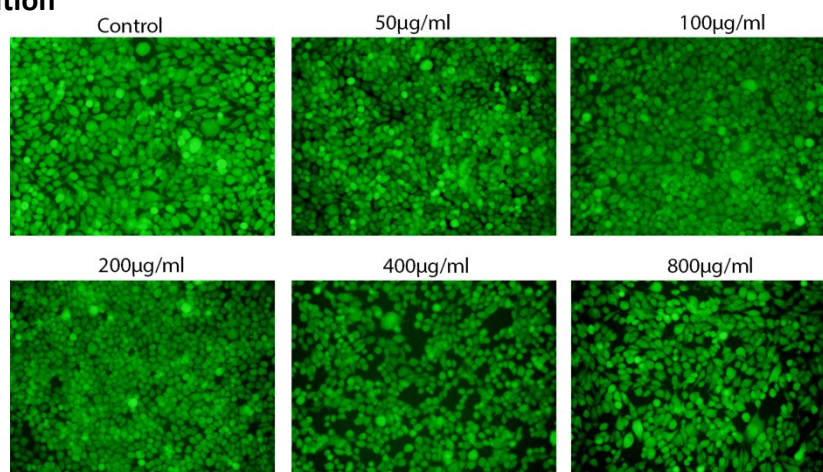

**Fig. S1. The effect of nano-HAP treatment on OS-732 cell proliferation.** Cells were incubated with the indicated concentrations of nano-HAPs for 1 day prior to staining with FDA.

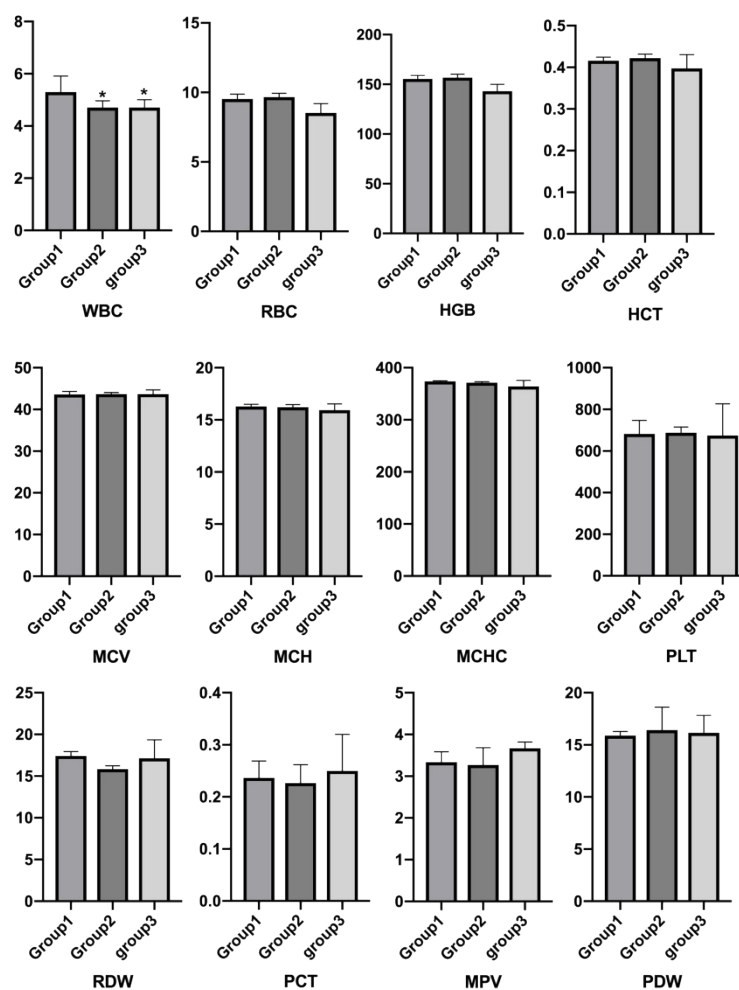

**Fig. S2. Routine blood examination of xenograft-bearing mice (n=6).** Experimental design is as described in **Figure 5**. Bar graphs are presented as the mean  $\pm$  SD (n=6). \* $p < 0.05$  compared to the control (group 1). WBC: white blood cells,  $10^3/\text{mm}$ ; RBC: red blood cells,  $10^6/\text{mm}$ ; HGB: hemoglobin concentration, g/L; HCT: hematocrit; MCV, mean corpuscular volume, fL; MCH, mean corpuscular hemoglobin, pg; MCHC, mean corpuscular hemoglobin concentration, g/L; PLT, platelet,  $10^3/\text{mm}$ ; RDW, red blood cell distribution width, %; PCT, platelet hematocrit, fL; MPV, mean platelet volume, fL; PDW, platelet volume distribution width, %.

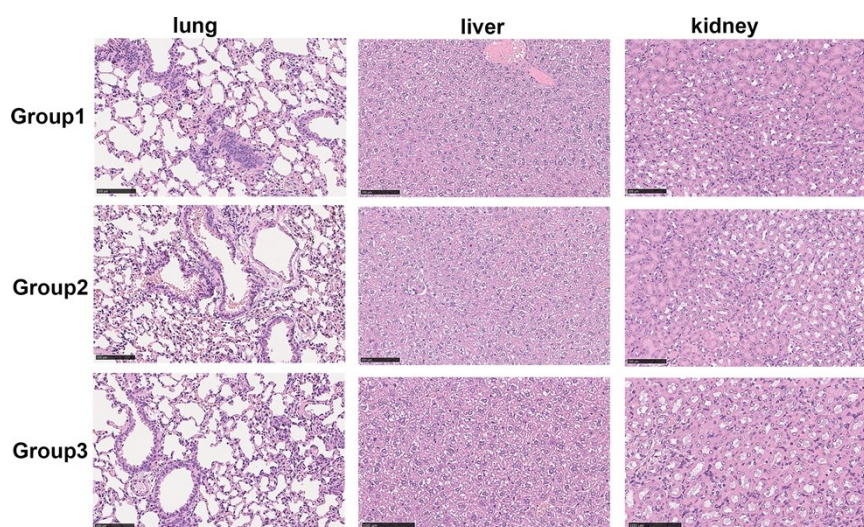

Fig. S3. H&E staining of lungs, livers and kidneys from xenograft-bearing mice. Scale bars are 100  $\mu$ m.

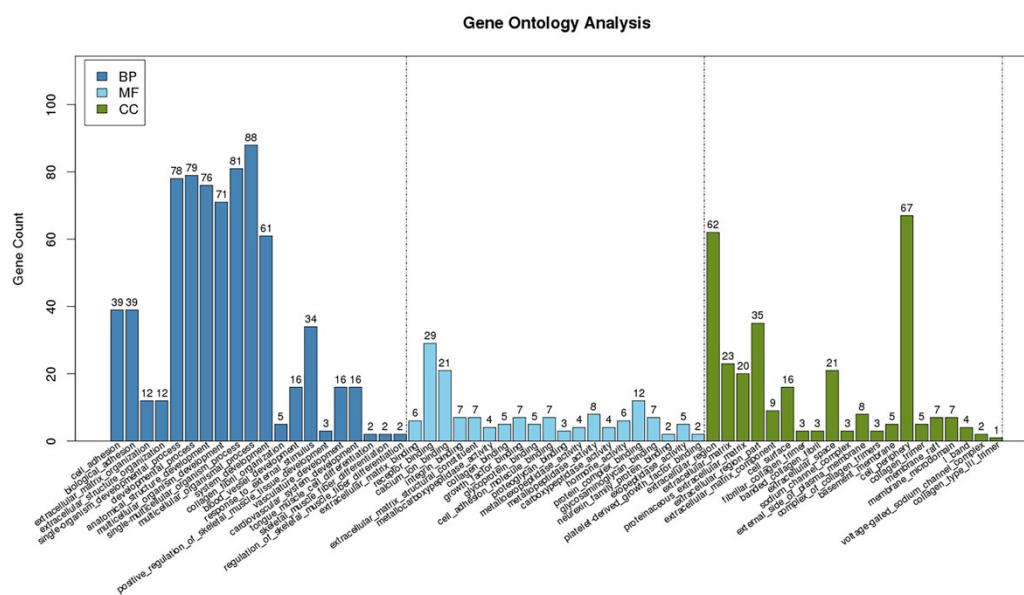

Fig. S4. Gene ontology (GO) classifications for downregulated genes. OS-732 cells were treated with the indicated concentrations of nano-HAPs for 24 h prior to analysis. GO analysis of downregulated genes for biological processes (BP), cellular components (CC), and molecular functions (MF), respectively.

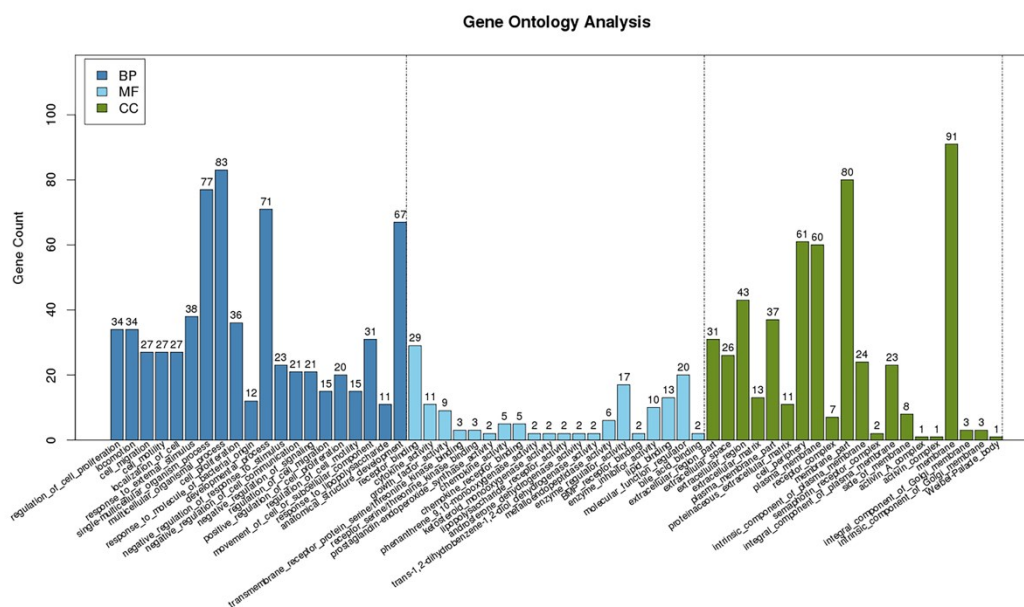

Fig. S5. Gene ontology (GO) classifications for upregulated genes. OS-732 cells were treated with the indicated concentrations of nano-HAPs for 24 h prior to analysis. GO analysis of upregulated genes for biological processes (BP), cellular components (CC), and molecular functions (MF), respectively.
